# Supplementary material for: Modeling Public Willingness to Pay for Green Cultural Heritage Conservation: A Contingent Valuation Approach in Tokyo
Source: Research Square preprint supplement (doi:10.21203/rs.3.rs-7613748/v1), 2025-11-26
Supplement: Supplementary file 1 [file 0a3244a585d68ed13a784ab3.docx]

Appendix A. Supplementary data（The Green Cultural Heritage List of Tokyo）

| **Name of GCH in Tokyo** | | GCH Grade | | Building/Antiquities Grade in GCH | | Other titles | |
| --- | --- | --- | --- | --- | --- | --- | --- |
| Shinjuku Gyoen National Garden | |  | |  | |  | |
| Chidorigafuchi National Cemetery | |  | |  | |  | |
| Kokyo Gaien National Garden (Kitanomaru Park) | |  | |  | |  | |
| The National Museum of Western Art Garden | |  | |  | |  | |
| Kaitokukan Garden | |  | |  | |  | |
| Koishikawa Korakuen Garden | |  | |  | |  | |
| Kyu-Furukawa Garden | |  | |  | |  | |
| Mitsukoshi Honten Nihonbashi Garden | |  | |  | |  | |
| Kyu-Asakura House Garden | |  | |  | |  | |
| Omori Shell Mounds | |  | |  | |  | |
| Shirayuri University's Megumi-so Garden | |  | |  | |  | |
| Kiyosumi Garden | |  | |  | |  | |
| Imperial Palace East Garden | |  | |  | |  | |
| Rikugien Garden | |  | |  | |  | |
| Kyu-Shibarikyu Garden | |  | |  | |  | |
| Hamarikyu Garden | |  | |  | |  | |
| Makino Memorial Garden & Museum | |  | |  | |  | |
| Kyu-Shibarikyu Garden | |  | |  | |  | |
| Senso-ji Temple Denpoin Garden | |  | |  | |  | |
| Tokyo Metropolitan Teien Art Museum's Garden | |  | |  | |  | |
| Tetsugakudo Park | |  | |  | |  | |
| Yokoyama Taikan Memorial Hall Garden | |  | |  | |  | |
| Mukojima-Hyakkaen Garden | |  | |  | |  | |
| Koishikawa Botanical Garden | |  | |  | |  | |
| Tonogayato Garden | |  | |  | |  | |
| Tamura Sake Brewery Garden | |  | |  | |  | |
| Manganji Temple Garden | |  | |  | |  | |
| Todoroki Valley Park | |  | |  | |  | |
| Yushima Tenjin Shrine Garden | |  | |  | |  | |
| Kyu-Yasuda Kusuo House Garden | |  | |  | |  | |
| Calligraphy Museum | |  | |  | |  | |
| Shikian | |  | |  | |  | |
| Ikegami Honmon-ji Temple Shotoen Garden | |  | |  | |  | |
| Kyu-Yasuda Garden | |  | |  | |  | |
| Musashi Kokubun-ji Temple | |  | |  | |  | |
| Hinojuku Honjin Garden | |  | |  | |  | |
| Horikiri Shobuen Iris Garden | |  | |  | |  | |
| Yakushi-no-izumi Garden Park | |  | |  | |  | |
| Kyu-Iwasaki-tei Gardens | |  | |  | |  | |
| Goto Museum Garden | |  | |  | |  | |
| Hotel Chinzanso Garden | |  | |  | |  | |
| Ryushi Park | |  | |  | |  | |
| Shimazono Residence Garden | |  | |  | |  | |
| kudan house Garden | |  | |  | |  | |
| Nezu-Jinja Shrine Azalea Garden | |  | |  | |  | |
| Musee Tomo's Garden | |  | |  | |  | |
| Tozen-ji Temple Garden | |  | |  | |  | |
| Kyu-Maeda House Garden | |  | |  | |  | |
| Koganei Park | |  | |  | |  | |
| Seikado Bunko Garden | |  | |  | |  | |
| Akasaka Palace Yushintei Garden | |  | |  | |  | |
| Kadokawa Garden | |  | |  | |  | |
| Otaguro Park | |  | |  | |  | |
| ASAKURA Museum of Sculpture's Garden | |  | |  | |  | |
| Takahata-Fudoson Kongo-ji Temple Garden | |  | |  | |  | |
| Saneatsu Park | |  | |  | |  | |
| Jisshi Park | |  | |  | |  | |
| Kuhonbutsu Joshinji Temple Garden | |  | |  | |  | |
| Meiji Memorial Hall Garden | |  | |  | |  | |
| Kansen-ji Temple Garden | |  | |  | |  | |
| Sawanoien Garden | |  | |  | |  | |
| Jidayubori Park | |  | |  | |  | |
| Seiganin Temple Garden | |  | |  | |  | |
| Motomachi Park (Bunkyo Ward) | |  | |  | |  | |
| Ueno Park | |  | |  | |  | |
| Kyu-Shibusawa Garden | |  | |  | |  | |
| Kansenen Garden | |  | |  | |  | |
| Shin-Edogawa Park | |  | |  | |  | |
| Sekiguchidai Park | |  | |  | |  | |
| Hibiya Park | |  | |  | |  | |
| Asukayama Park | |  | |  | |  | |
| Kogenin Temple Garden | |  | |  | |  | |
| Sekiguchi Basho-an Garden | |  | |  | |  | |
| Otomeyama Park | |  | |  | |  | |
| Meiji-Jingu Shrine Garden | |  | |  | |  | |
| Mitsui Hachiroemon's House Garden | |  | |  | |  | |
| Futakotamagawa Park Kishinen Garden | |  | |  | |  | |
| Nanushi-no-Taki Park | |  | |  | |  | |
| Hotel Edoya Garden | |  | |  | |  | |
| The Taro Okamoto Memorial Museum | |  | |  | |  | |
| VISVIM GENERAL STORE | |  | |  | |  | |
| Grand Prince Hotel Takanawa's Japanese Garden | |  | |  | |  | |
| Kosoan Garden | |  | |  | |  | |
| Sudo Park | |  | |  | |  | |
| Hanahata Memorial Garden | |  | |  | |  | |
| Tokyo Chikuyotei Honten Garden | |  | |  | |  | |
| FOREST IN FOREST | |  | |  | |  | |
| Shiba Park Momijidani Garden | |  | |  | |  | |
| Shinagawa Historical Museum Garden | |  | |  | |  | |
| Zojoji Temple “Benten-ike” Garden | |  | |  | |  | |
| Hotel Le Port Kojimachi Garden | |  | |  | |  | |
| GINZA SIX Garden | |  | |  | |  | |
| Teaceremony Room “Goan” | |  | |  | |  | |
| Enjutoru Garden | |  | |  | |  | |
| Kinegawa-Yakushi Jokoji Temple | |  | |  | |  | |
| Sotoya Shioiri Garden | |  | |  | |  | |
| Daisho-ji Temple Garden | |  | |  | |  | |
| Seishoji Temple Garden | |  | |  | |  | |
| Togo Shrine Garden | |  | |  | |  | |
| Soho Park | |  | |  | |  | |
| Hayashi Fumiko Memorial Hall | |  | |  | |  | |
| Tokyo National Museum Garden | |  | |  | |  | |
| Happoen Garden | |  | |  | |  | |
| Okuma Garden | |  | |  | |  | |
| Hotel Chinzanso Garden | |  | |  | |  | |
| Senshunen Garden | |  | |  | |  | |
| Hatoyama Hall's Garden | |  | |  | |  | |
| Gotenyama Garden | |  | |  | |  | |
| Fukusen-ji Temple Garden | |  | |  | |  | |
| Gyosen Park | |  | |  | |  | |
| Ganko Shinjuku Yamano Aiko-tei's Garden | |  | |  | |  | |
| Koyama Garden | |  | |  | |  | |
| Suisha Park | |  | |  | |  | |
| Yasukuni Shrine Garden | |  | |  | |  | |
| Former Duke of Shimazu House's Garden | |  | |  | |  | |
| Ikedayama Park | |  | |  | |  | |
| Sanbancho Kyoyo-Kaigisho's Garden | |  | |  | |  | |
| Nezu Museum's Garden | |  | |  | |  | |
| Kabuki-za Roof Garden | |  | |  | |  | |
| Takahashi Korekiyo Memorial Park | |  | |  | |  | |
| Nakano Historical Museum's Garden | |  | |  | |  | |
| Seijo 5 Chome Inomata Garden | |  | |  | |  | |
| Seta 4 Chome Kyu-Kosaka Park | |  | |  | |  | |
| Grand Prince Hotel Takanawa's Japanese Garden | |  | |  | |  | |
| Togoshi Park | |  | |  | |  | |
| Mouri Garden | |  | |  | |  | |
| Inokashira Park | |  | |  | |  | |
| Roka Koshunen Garden | |  | |  | |  | |
| Hinokicho Park | |  | |  | |  | |
| National Diet Building Garden | |  | |  | |  | |
| Shimizudani Park | |  | |  | |  | |
| Hotel New Otani Tokyo Japanese Garden | |  | |  | |  | |
| Sumida Park | |  | |  | |  | |
| Oyokogawa Shinsui Park | |  | |  | |  | |
| Yokoamicho Park | |  | |  | |  | |
| Meguro Sky Garden | |  | |  | |  | |
| Sugekari Park | |  | |  | |  | |
| Saigoyama Park | |  | |  | |  | |
| Nabeshima Shoto Park | |  | |  | |  | |
| Arisugawanomiya Memorial Park | |  | |  | |  | |
| Mejiro Garden | |  | |  | |  | |
| Shibamata Taishakuten Suikeien Garden | |  | |  | |  | |
| Yamamoto-tei Garden | |  | |  | |  | |
| Hitachi Central Research Laboratory's Garden | |  | |  | |  | |
| Hirakushi Denchu Art Museum's Garden | |  | |  | |  | |
| Hinata-wada Rinsen Garden | |  | |  | |  | |
| Shiofune Kannon-ji Temple Azeleas Garden | |  | |  | |  | |
| Soro Senen Garden | |  | |  | |  | |
| Fuchu-no-mori Park | |  | |  | |  | |
| Ganko Musashino-Tachikawa Yashiki's Garden | |  | |  | |  | |
| Jindai Botanical Gardens | |  | |  | |  | |
| Gyokudo Art Museum Garden | |  | |  | |  | |
| Showa Kinen Park Japanese Garden | |  | |  | |  | |
| Fuchu-no-mori Park | |  | |  | |  | |
| Note: | National Garden | |  | | 100 Historical Parks in Japan | |  |
|  | Cultural property at National level | |  | |  |
|  | Cultural property at Tokyo Metropolitan level | |  | | 57 famous springs in Tokyo | |  |
|  | Cultural property at Municipal/District level | |  | |  |
